# Supplementary material for: Comparison of the Morpho-Physiological and Molecular Responses to Salinity and Alkalinity Stresses in Rice
Source: MDPI journal article supplement (doi:10.3390/plants13010060), 2023-12-23
Supplement: s1 [file s1]

**Supplementary Table S1.** Analysis of variance for ten morpho-physiological parameters in rice genotypes at the seedling stage under both alkaline and saline stress

| Trait name                      | SIS                  | CHL (SPAD units)     | SL (cm)              | RL (cm)              | SNC (mmol kg <sup>-1</sup> ) | SKC (mmol kg <sup>-1</sup> ) | RNC (mmol kg <sup>-1</sup> ) | RKC (mmol kg <sup>-1</sup> ) | SNaK (ratio)         | RNaK (ratio)        |
|---------------------------------|----------------------|----------------------|----------------------|----------------------|------------------------------|------------------------------|------------------------------|------------------------------|----------------------|---------------------|
| Genotype (F values)             | 17.46 <sup>***</sup> | 12.08 <sup>***</sup> | 35.26 <sup>***</sup> | 12.20 <sup>***</sup> | 0.94 <sup>ns</sup>           | 1.60 <sup>ns</sup>           | 9.43 <sup>***</sup>          | 5.70 <sup>***</sup>          | 1.31 <sup>ns</sup>   | 8.55 <sup>***</sup> |
| Treatment (F values)            | 3.85 <sup>ns</sup>   | 0.001 <sup>ns</sup>  | 11.87 <sup>**</sup>  | 9.97 <sup>**</sup>   | 0.61 <sup>ns</sup>           | 31.74 <sup>***</sup>         | 3.20 <sup>ns</sup>           | 35.08 <sup>***</sup>         | 37.96 <sup>***</sup> | 4.74 <sup>**</sup>  |
| Genotype x Treatment (F values) | 4.87 <sup>*</sup>    | 2.26 <sup>ns</sup>   | 2.06 <sup>ns</sup>   | 0.33 <sup>ns</sup>   | 1.18 <sup>ns</sup>           | 2.50 <sup>ns</sup>           | 7.86 <sup>***</sup>          | 9.07 <sup>***</sup>          | 0.50 <sup>ns</sup>   | 4.13 <sup>**</sup>  |

SIS, salt injury score; CHL, chlorophyll content, SL, shoot length; RL, root length; Trait means are averages of three replications, SNC, shoot sodium concentration; SKC, shoot potassium concentration, RNC, root sodium concentration; RKC, shoot potassium concentration; SNaK, ratio of sodium and potassium concentration in shoot; RNaK, ratio of sodium and potassium concentration in root

\*, \*\*, \*\*\* indicate significance at 0.05, 0.01, and 0.001 probability level

a, b, c, d represent Tukey lettering for determining difference among genotypes and shared letter between the genotypes indicates no significant difference at 0.05 probability level.

**Supplementary Table S2.** Trait means for ten morpho-physiological parameters in rice genotypes at the seedling stage under control condition.

| Genotype                     | Pokkali          | Geumgangbyeon    | Mermentau        | Bengal           |
|------------------------------|------------------|------------------|------------------|------------------|
| SIS                          | 1 ± 0.0          | 1 ± 0.0          | 1 ± 0.0          | 1 ± 0.0          |
| CHL (SPAD units)             | 32.56 ± 0.64     | 29.05 ± 1.05     | 31.96 ± 2.7      | 32.86 ± 2.2      |
| SL (cm)                      | 47.22 ± 2.9      | 36.66 ± 2.3      | 40.38 ± 3.9      | 45 ± 2.58        |
| RL (cm)                      | 13.72 ± 2.42     | 10.55 ± 1.17     | 9.64 ± 1.03      | 9.66 ± 0.76      |
| SNC (mmol kg <sup>-1</sup> ) | 90.47 ± 7.7      | 45.58 ± 5.46     | 18.65 ± 2.32     | 72.52 ± 5.44     |
| SKC (mmol kg <sup>-1</sup> ) | 1463.003 ± 89.9  | 1334.05 ± 101.34 | 1237.35 ± 123.24 | 1538.22 ± 121.94 |
| RNC (mmol kg <sup>-1</sup> ) | 213.09 ± 10.4    | 135.54 ± 17.66   | 95.48 ± 18.82    | 227.95 ± 23.22   |
| RKC (mmol kg <sup>-1</sup> ) | 2466.44 ± 168.49 | 2124.25 ± 102.78 | 2675.76 ± 112.76 | 2090.95 ± 132.70 |
| SNaK (ratio)                 | 0.0616 ± 0.003   | 0.03 ± 0.02      | 0.01 ± 0.01      | 0.04 ± 0.009     |
| RNaK (ratio)                 | 0.08 ± 0.01      | 0.06 ± 0.02      | 0.03 ± 0.01      | 0.11 ± 0.02      |

SIS, salt injury score; CHL, chlorophyll content, SL, shoot length; RL, root length; Trait means are averages of three replications, SNC, shoot sodium concentration; SKC, shoot potassium concentration, RNC, root sodium concentration; RKC, shoot potassium concentration; SNaK, ratio of sodium and potassium concentration in shoot; RNaK, ratio of sodium and potassium concentration in root
